# Supplementary material
Source: Elsevier journal article supplement (http://researchonline.lshtm.ac.uk/1932/1/mmc1.pdf)
Supplement: mmc1 [file mmc1.pdf]

LONDON  
SCHOOL of  
HYGIENE  
& TROPICAL  
MEDICINE

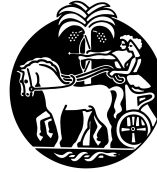

Dondorp, AM; Fanello, CI; Hendriksen, IC; Gomes, E; Seni, A; Chhaganlal, KD; Bojang, K; Olaosebikan, R; Anunobi, N; Maitland, K; Kivaya, E; Agbenyega, T; Nguah, SB; Evans, J; Gesase, S; Kahabuka, C; Mtove, G; Nadjm, B; Deen, J; Mwanga-Amumpaire, J; Nansumba, M; Karema, C; Umulisa, N; Uwimana, A; Mokuolu, OA; Adedoyin, OT; Johnson, WB; Tshefu, AK; Onyamboko, MA; Sakulthaew, T; Ngum, WP; Silamut, K; Stepniewska, K; Woodrow, CJ; Bethell, D; Wills, B; Oneko, M; Peto, TE; von Seidlein, L; Day, NP; White, NJ; AQUAMAT group (2010) Artesunate versus quinine in the treatment of severe falciparum malaria in African children (AQUAMAT): an open-label, randomised trial. *Lancet*, 376 (9753). pp. 1647-57. ISSN 0140-6736 DOI: 10.1016/S0140-6736(10)61924-1

Downloaded from: <http://researchonline.lshtm.ac.uk/1932/>

DOI: [10.1016/S0140-6736\(10\)61924-1](https://doi.org/10.1016/S0140-6736(10)61924-1)

#### Usage Guidelines

Please refer to usage guidelines at <http://researchonline.lshtm.ac.uk/policies.html> or alternatively contact [researchonline@lshtm.ac.uk](mailto:researchonline@lshtm.ac.uk).

Available under license: <http://creativecommons.org/licenses/by-nc-nd/2.5/>

# Supplemental material to “Artesunate versus quinine in the treatment of severe falciparum malaria in African children (AQUAMAT): an open-label, randomized trial”

|                                                                                                                       |      |
|-----------------------------------------------------------------------------------------------------------------------|------|
| 1. Enrollment history by site                                                                                         | P.2  |
| 2. Methods and findings Mortality Endpoint Review Committee                                                           | P.3  |
| 3. Methods Neurological Endpoint Committee                                                                            | P.5  |
| 4. Quality assessment artesunate batches used in the trial                                                            | P.7  |
| 5. Quality assessment quinine batches used in the trial                                                               | P.10 |
| 6. Assessing pretreatment: Classification of the efficacy of antimalarial drugs                                       | P.12 |
| 7. National and Sponsor Ethics Committee/Institutional Review Board (EC/IRB) approval documents for the AQUAMAT trial | P.13 |

# 1. Enrollment history by site

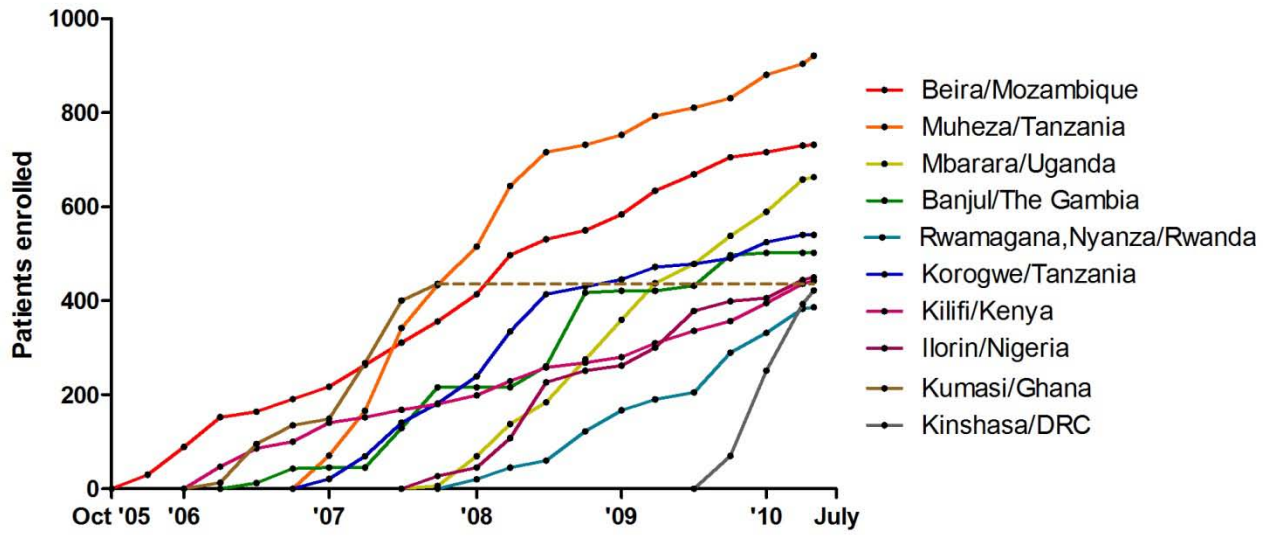

## **2. Methods and findings Mortality Endpoint Review Committee**

Method: The end-point review committee included one paediatrician with malaria experience and one clinical malariologist. The reviewers assessed the fatal cases independently from the trial investigators, and were blinded towards the study drug treatment allocations. All clinical and laboratory data (including those from the parasitology reference laboratory) were reviewed, along with the 'Severe Adverse Events' forms. Cases were only defined when both reviewers independently judged that a pathology other than malaria or its acute complications was the main cause of death.

**Table 1.** Cases with pathology other than malaria (or its acute complications) as a likely cause of death.

| Age  | Gender | Relevant details                                                                                                                                                                     |
|------|--------|--------------------------------------------------------------------------------------------------------------------------------------------------------------------------------------|
| 6 y  | F      | Sudden onset of abdominal pain without fever. Death occurred within three hours of symptom onset. Parasitaemia 5/1000 RBC (no pretreatment)                                          |
| 22 m | M      | Death followed return of consciousness and defervescence                                                                                                                             |
| 3 y  | F      | Death followed return of consciousness and defervescence                                                                                                                             |
| 7 m  | M      | History of diarrhoea, vomiting and generalized rash. Clinical diagnosis of measles. Parasitaemia 8/200 WC (one dose of pyrimethamine-sulfadoxine pretreatment)                       |
| 3 y  | M      | Clinical diagnosis of tetanus. Parasitaemia 3/1000 RBC (no pretreatment)                                                                                                             |
| 11 m | F      | Death followed return of consciousness and defervescence                                                                                                                             |
| 21 m | M      | Death followed return of consciousness and defervescence                                                                                                                             |
| 5 y  | F      | Suspected meningitis. <i>Haemophilus influenzae</i> type b isolated from blood culture. Parasitaemia 2/1000 RBC (pyrimethamine-sulfadoxine pretreatment)                             |
| 6 y  | F      | Clinical diagnosis of tetanus. Parasitaemia 3/1000 RBC (no pretreatment)                                                                                                             |
| 3 m  | M      | Clinical diagnosis of mastoiditis. Group A streptococcus isolated from blood culture. Parasitaemia 13/1000 RBC (no pretreatment)                                                     |
| 4 y  | M      | Clinical diagnosis of left-sided pneumonia. <i>Haemophilus influenzae</i> type b isolated from blood culture. Parasitaemia 81/200 WC (two doses of quinine pretreatment)             |
| 22 m | M      | Clinical diagnosis of myositis. Group A streptococcus isolated from blood culture. Parasitaemia 2/200 WC (three doses of quinine pretreatment)                                       |
| 14 m | F      | Clinical diagnosis of severe acute malnutrition. <i>Salmonella</i> spp. isolated from blood culture. Parasitaemia 1/200 WC (no pretreatment)                                         |
| 6 m  | M      | Clinical diagnosis of severe cellulitis. Group A streptococcus isolated from blood culture. Parasitaemia 1/500 WC (six doses of artemether-lumefantrine pretreatment)                |
| 16 m | M      | Clinical observation of pustular rash and impetigo (no coma). <i>Staphylococcus aureus</i> isolated from blood culture. Parasitaemia 3/200 WC (one dose of amodiaquine pretreatment) |
| 14 m | M      | Death followed return of consciousness and defervescence                                                                                                                             |

### 3. Methods Neurological Endpoint Committee

Neurological sequelae were divided into 4 functional domains or systems, including motor deficits, vision deficits, hearing and speech deficits and persisting seizures. Severity of the deficits was graded according to the tables below. In case a patient had a pathological entry in 2 or more functional domains, the deficit with the most severe grade was moved up one 'severity grade' if the 'severe' grade had not yet been reached (Example 1: cerebellar ataxia (severe) + speech difficulties (mild) = total grade is severe. Example 2: Facial nerve palsy (moderate) + speech difficulties (mild) = total grade is severe). In case the clinical record form mentioned a pre-existing neurological problem and there was no significant deterioration of symptoms during the malaria episode, the neurological problems were not considered as being sequelae of the acute disease episode.

#### FUNCTIONAL SYSTEMS TABLES

##### 1) MOTOR

| CRF Entry               | MILD | MODERATE | SEVERE |
|-------------------------|------|----------|--------|
| Monoparesis             |      | x        |        |
| Hemiplegia/paresis      |      |          | x      |
| Quadriparesis           |      |          | x      |
| Continued posturing     |      |          | x      |
| Hypotonia               | x    |          |        |
| Extrapyramidal rigidity |      |          | x      |
| Cerebellar Ataxia       |      |          | x      |
| Gait * unsteady         | x    |          |        |
| Gait* hemiplegic/ataxic |      |          | x      |
| Gait* unable to walk    |      |          | x      |
| Cranial nerve palsies   |      | x        |        |
| Facial nerve palsy      |      | x        |        |

\* Gait was considered only in children > 18 months

IF there is more than one pathological entry within the motor system: the most severe grading prevails.

## 2) VISION

| CRF entry                  | MILD | MODERATE | SEVERE |
|----------------------------|------|----------|--------|
| Blindness bilateral        |      |          | x      |
| Blindness unilateral       |      | x        |        |
| Some impairment bilateral  |      | x        |        |
| Some impairment unilateral | x    |          |        |

## 3) HEARING and SPEECH

| CRF entry                      | MILD | MODERATE | SEVERE |
|--------------------------------|------|----------|--------|
| Deafness bilateral             |      |          | X      |
| Deafness unilateral            |      | x        |        |
| Possible impairment bilateral  |      | x        |        |
| Possible impairment unilateral | x    |          |        |
| Speech difficulties*           | x    |          |        |
| Unable to speak*               |      |          | X      |

\*Speech was assessed only in children > 18 months

## 4) SEIZURES

In patients with no previous history of seizures:

Any seizures - moderate

#### **4. Quality assessment of artesunate batches used in the trial**

LC-MS/MS Analysis of the artesunate content in vials for injection

##### **Methods<sup>1</sup>:**

From each batch, 3 vials were selected for testing. Each vial's content was quantified using 3 replicate measurements. Samples were quantified using a standard curve constructed from 3 replicate samples at each calibration level (concentrations 19.2, 24.0, 28.8 ng/ml). Results for each vial and a batch average were summarized.

##### **Sample preparation:**

The content of each vial to be tested was reconstituted in 1.0-1.5 mL ethanol. The whole amount was transferred into a 250 ml volumetric flask thereby diluting the solution to 240 µg/ml (assuming initial content as stated; 60 mg). This solution was further diluted using volumetric flasks to a final approximate concentration of 24 ng/ml.

##### **Quantification:**

Samples were quantified using an API 5000 triple quadrupole mass spectrometer (Applied Biosystems/MDS SCIEX, Foster City, USA). The final sample was injected into the LC-MS/MS system equipped with a TurboV ionization source (TIS) interface operated in the positive ion mode. Quantification was performed using selected reaction monitoring (SRM) for the transition m/z 402 – 163.

**Results:** The following results (table 1) were obtained for the different batches.

**Conclusion:** all tested vials' contents come within GMP specification of +/- 10% of stated content.

##### **Reference.**

Hanpithakpong W, Kamanikom B, Dondorp AM, Singhasivanon P, White NJ, Day NP, Lindegardh N. A liquid chromatographic-tandem mass spectrometric method for determination of artesunate and its metabolite dihydroartemisinin in human plasma. *J Chromatogr B Analyt Technol Biomed Life Sci.* 2008; 876: 61-8.



| Site             | Batch    | Expire | pha ID | ARS (mg/vial) | Amount (%) | Average (%)   | Batch average (%) |
|------------------|----------|--------|--------|---------------|------------|---------------|-------------------|
| Mozambique       | 60109    | Dec-08 | A1 1   | 57.00         | 95.00      | <b>95.28</b>  | <b>95.28</b>      |
|                  |          |        | A1 2   | 57.25         | 95.42      |               |                   |
|                  |          |        | A1 3   | 57.25         | 95.42      |               |                   |
|                  | ZA070701 | Jun-10 | B1 1   | 58.00         | 96.67      | <b>96.94</b>  | <b>93.79</b>      |
|                  |          |        | B1 2   | 58.25         | 97.08      |               |                   |
|                  |          |        | B1 3   | 58.25         | 97.08      |               |                   |
|                  |          |        | B2 1   | 54.00         | 90.00      | <b>90.00</b>  |                   |
|                  |          |        | B2 2   | 54.25         | 90.42      |               |                   |
|                  |          |        | B2 3   | 53.75         | 89.58      |               |                   |
|                  |          |        | B3 1   | 56.75         | 94.58      | <b>94.44</b>  |                   |
|                  |          |        | B3 2   | 56.25         | 93.75      |               |                   |
|                  |          |        | B3 3   | 57.00         | 95.00      |               |                   |
| Kenya            | ZA060903 | Aug-09 | C1 1   | 55.50         | 92.50      | <b>92.50</b>  | <b>93.84</b>      |
|                  |          |        | C1 2   | 55.25         | 92.08      |               |                   |
|                  |          |        | C1 3   | 55.75         | 92.92      |               |                   |
|                  |          |        | C2 1   | 57.50         | 95.83      | <b>95.28</b>  |                   |
|                  |          |        | C2 2   | 56.75         | 94.58      |               |                   |
|                  |          |        | C2 3   | 57.25         | 95.42      |               |                   |
|                  |          |        | C3 1   | 56.00         | 93.33      | <b>93.75</b>  |                   |
|                  |          |        | C3 2   | 56.25         | 93.75      |               |                   |
|                  |          |        | C3 3   | 56.50         | 94.17      |               |                   |
| Tanzania Korogwe | ZA070406 | Mar-10 | D1 1   | 56.25         | 93.75      | <b>92.36</b>  | <b>91.53</b>      |
|                  |          |        | D1 2   | 54.75         | 91.25      |               |                   |
|                  |          |        | D1 3   | 55.25         | 92.08      |               |                   |
|                  |          |        | D2 1   | 54.25         | 90.42      | <b>90.55</b>  |                   |
|                  |          |        | D2 2   | 54.25         | 90.42      |               |                   |
|                  |          |        | D2 3   | 54.50         | 90.83      |               |                   |
|                  |          |        | D3 1   | 55.50         | 92.50      | <b>91.67</b>  |                   |
|                  |          |        | D3 2   | 54.50         | 90.83      |               |                   |
|                  |          |        | D3 3   | 55.00         | 91.67      |               |                   |
| Tanzania Muheza  | ZA070406 | Mar-10 | E1 1   | 62.25         | 103.75     | <b>102.78</b> | <b>98.15</b>      |
|                  |          |        | E1 2   | 61.25         | 102.08     |               |                   |
|                  |          |        | E1 3   | 61.50         | 102.50     |               |                   |
|                  |          |        | E2 1   | 55.25         | 92.08      | <b>91.80</b>  |                   |
|                  |          |        | E2 2   | 54.50         | 90.83      |               |                   |
|                  |          |        | E2 3   | 55.50         | 92.50      |               |                   |
|                  |          |        | E3 1   | 60.00         | 100.00     | <b>99.86</b>  |                   |
|                  |          |        | E3 2   | 60.00         | 100.00     |               |                   |
|                  |          |        | E3 3   | 59.75         | 99.58      |               |                   |

| Site       | Batch    | Expire   | pha ID | ARS (mg/vial) | Amount (%) | Average (%)   | Batch average (%) |
|------------|----------|----------|--------|---------------|------------|---------------|-------------------|
| The Gambia | ZA060203 | Jan-09   | F1 1   | 58.75         | 97.92      | <b>97.78</b>  | <b>96.76</b>      |
|            |          |          | F1 2   | 58.25         | 97.08      |               |                   |
|            |          |          | F1 3   | 59.00         | 98.33      |               |                   |
|            |          |          | F2 1   | 59.75         | 99.58      | <b>100.00</b> |                   |
|            |          |          | F2 2   | 59.75         | 99.58      |               |                   |
|            |          |          | F2 3   | 60.50         | 100.83     |               |                   |
|            |          |          | F3 1   | 55.50         | 92.50      | <b>92.50</b>  |                   |
|            |          |          | F3 2   | 55.25         | 92.08      |               |                   |
|            |          |          | F3 3   | 55.75         | 92.92      |               |                   |
| Uganda     | ZA070406 | Mar-10   | G1 1   | 59.75         | 99.58      | <b>100.14</b> | <b>92.50</b>      |
|            |          |          | G1 2   | 60.25         | 100.42     |               |                   |
|            |          |          | G1 3   | 60.25         | 100.42     |               |                   |
|            |          |          | G2 1   | 55.25         | 92.08      | <b>92.08</b>  |                   |
|            |          |          | G2 2   | 55.50         | 92.50      |               |                   |
|            |          |          | G2 3   | 55.00         | 91.67      |               |                   |
|            |          |          | G3 1   | 51.25         | 85.42      | <b>85.28</b>  |                   |
|            |          |          | G3 2   | 50.75         | 84.58      |               |                   |
|            |          |          | G3 3   | 51.50         | 85.83      |               |                   |
| Nigeria    | ZA070701 | Jun-10   | H1 1   | 54.75         | 91.25      | <b>91.39</b>  | <b>92.31</b>      |
|            |          |          | H1 2   | 54.50         | 90.83      |               |                   |
|            |          |          | H1 3   | 55.25         | 92.08      |               |                   |
|            |          |          | H2 1   | 57.50         | 95.83      | <b>96.39</b>  |                   |
|            |          |          | H2 2   | 58.00         | 96.67      |               |                   |
|            |          |          | H2 3   | 58.00         | 96.67      |               |                   |
|            |          |          | H3 1   | 53.75         | 89.58      | <b>89.17</b>  |                   |
|            |          |          | H3 2   | 53.25         | 88.75      |               |                   |
|            |          |          | H3 3   | 53.50         | 89.17      |               |                   |
| Rwanda     | ZA070701 | Jun-10   | I1 1   | 58.75         | 97.92      | <b>97.64</b>  | <b>95.00</b>      |
|            |          |          | I1 2   | 58.25         | 97.08      |               |                   |
|            |          |          | I1 3   | 58.75         | 97.92      |               |                   |
|            |          |          | I2 1   | 55.00         | 91.67      | <b>92.50</b>  |                   |
|            |          |          | I2 2   | 55.50         | 92.50      |               |                   |
|            |          |          | I2 3   | 56.00         | 93.33      |               |                   |
|            |          |          | I3 1   | 56.75         | 94.58      | <b>94.86</b>  |                   |
|            |          |          | I3 2   | 57.25         | 95.42      |               |                   |
|            |          |          | I3 3   | 56.75         | 94.58      |               |                   |
| DRC        | LA091001 | 10-08-12 | J1 1   | 57.25         | 95.42      | <b>95.00</b>  | <b>95.88</b>      |
|            |          |          | J1 2   | 57.25         | 95.42      |               |                   |
|            |          |          | J1 3   | 56.50         | 94.17      |               |                   |
|            |          |          | J2 1   | 57.50         | 95.83      | <b>96.25</b>  |                   |
|            |          |          | J2 2   | 58.00         | 96.67      |               |                   |
|            |          |          | J2 3   | 57.75         | 96.25      |               |                   |
|            |          |          | J3 1   | 57.50         | 95.83      | <b>96.39</b>  |                   |

## 5. Quality assessment of quinine batches used in the trial

LC-UV Analysis of Quinine content in vials for injection

### **Methods** (modified from ref. 1):

From each batch, 3 vials were selected for testing. Each vial's content was quantified using 3 replicate measurements. Samples were quantified using a standard curve constructed from 3 replicate samples at each calibration level (concentrations 15.7, 19.6 and 23.4 µg/ml). Results for each vial and a batch average were summarized.

### **Sample preparation:**

The content of each vial to be tested was transferred into a 100 ml volumetric flask thereby diluting the solution to 6.00 mg/ml (assuming initial content 600 mg). Exactly 1000 µl of this solution was further diluted using a 250 ml volumetric flask to a final approximate concentration of 19.6 µg/ml.

### **Quantification:**

Samples were quantified using a LaChrom Elite LC-UV system (Hitachi, Tokyo, Japan). Quantification was performed at the wavelength 250 nm.

**Results:** The following results (table 1) were obtained for the different batches.

**Conclusion:** all tested vials contained between 105-112% of stated content.

### **Reference.**

1. Newton PN, Keeratithakul D, Teja-Isavadharm P, Pukrittayakamee S, Kyle D, White NJ. Pharmacokinetics of quinine and 3-hydroxyquinine in severe falciparum malaria with acute renal failure. Transactions of the Royal Society of Tropical Medicine and Hygiene, 1999, 93:69–72.

| Site       | Batch | Expire | pha ID | QN (mg/vial) | Amount (%) | Average (%) | Batch average (%) |
|------------|-------|--------|--------|--------------|------------|-------------|-------------------|
| Mozambique | 396   | Mar-10 | A1 1   | 627.56       | 104.59     | 105.42      | 106.06            |
|            |       |        | A1 2   | 634.11       | 105.68     |             |                   |
|            |       |        | A1 3   | 635.94       | 105.99     |             |                   |
|            |       |        | A2 1   | 633.62       | 105.60     |             |                   |
|            |       |        | A2 2   | 643.05       | 107.17     |             |                   |
|            |       |        | A2 3   | 641.76       | 106.96     |             |                   |
|            |       |        | A3 1   | 631.20       | 105.20     |             |                   |
|            |       |        | A3 2   | 633.65       | 105.61     |             |                   |
|            |       |        | A3 3   | 646.11       | 107.68     |             |                   |
|            | 397   | Sep-10 | B1 1   | 641.64       | 106.94     | 108.58      | 108.71            |
|            |       |        | B1 2   | 667.79       | 111.30     |             |                   |
|            |       |        | B1 3   | 645.01       | 107.50     |             |                   |
|            |       |        | B2 1   | 635.42       | 105.90     |             |                   |
|            |       |        | B2 2   | 641.58       | 106.93     |             |                   |
|            |       |        | B2 3   | 655.88       | 109.31     |             |                   |
|            |       |        | B3 1   | 651.68       | 108.61     |             |                   |
|            |       |        | B3 2   | 672.84       | 112.14     |             |                   |
|            |       |        | B3 3   | 658.60       | 109.77     |             |                   |
| Kenya      | 397   | Sep-10 | C1 1   | 639.47       | 106.58     | 108.21      | 108.50            |
|            |       |        | C1 2   | 650.55       | 108.42     |             |                   |
|            |       |        | C1 3   | 657.74       | 109.62     |             |                   |
|            |       |        | C2 1   | 646.35       | 107.73     |             |                   |
|            |       |        | C2 2   | 654.01       | 109.00     |             |                   |
|            |       |        | C2 3   | 661.30       | 110.22     |             |                   |
|            |       |        | C3 1   | 643.29       | 107.22     |             |                   |
|            |       |        | C3 2   | 658.85       | 109.81     |             |                   |
|            |       |        | C3 3   | 647.33       | 107.89     |             |                   |
| Korogwe    | 396   | Mar-10 | D1 1   | 626.94       | 104.49     | 105.60      | 105.13            |
|            |       |        | D1 2   | 636.01       | 106.00     |             |                   |
|            |       |        | D1 3   | 637.81       | 106.30     |             |                   |
|            |       |        | D2 1   | 620.57       | 103.43     |             |                   |
|            |       |        | D2 2   | 624.74       | 104.12     |             |                   |
|            |       |        | D2 3   | 637.93       | 106.32     |             |                   |
|            | 398   | Sep-10 | D3 1   | 625.14       | 104.19     | 105.18      |                   |
|            |       |        | D3 2   | 635.06       | 105.84     |             |                   |
|            |       |        | D3 3   | 632.97       | 105.50     |             |                   |
|            |       |        | E1 1   | 638.67       | 106.44     |             |                   |
|            |       |        | E1 2   | 643.41       | 107.24     |             |                   |
|            |       |        | E1 3   | 647.27       | 107.88     |             |                   |
| Muheza     | 396   | Mar-10 | E2 1   | 632.42       | 105.40     | 106.11      |                   |
|            |       |        | E2 2   | 638.76       | 106.46     |             |                   |
|            |       |        | E2 3   | 638.85       | 106.48     |             |                   |
|            |       |        | E3 1   | 627.80       | 104.63     |             |                   |
|            |       |        | E3 2   | 634.23       | 105.70     |             |                   |
|            |       |        | E3 3   | 628.72       | 104.79     |             |                   |
|            | 398   | Sep-10 | F1 1   | 663.25       | 110.54     | 111.24      | 111.00            |
|            |       |        | F1 2   | 673.82       | 112.30     |             |                   |
|            |       |        | F1 3   | 665.31       | 110.88     |             |                   |
|            |       |        | F2 1   | 654.80       | 109.13     |             |                   |
|            |       |        | F2 2   | 672.38       | 112.06     |             |                   |
|            |       |        | F2 3   | 662.80       | 110.47     |             |                   |
| The Gambia | 396   | Mar-10 | F3 1   | 660.68       | 110.11     | 111.20      |                   |
|            |       |        | F3 2   | 666.26       | 111.04     |             |                   |
|            |       |        | F3 3   | 674.71       | 112.45     |             |                   |
|            |       |        | G1 1   | 661.39       | 110.23     |             |                   |
|            |       |        | G1 2   | 676.70       | 112.78     |             |                   |
|            |       |        | G1 3   | 678.56       | 113.09     |             |                   |
|            | 399   | Sep-10 | G2 1   | 620.76       | 103.46     | 104.40      |                   |
|            |       |        | G2 2   | 622.04       | 103.67     |             |                   |
|            |       |        | G2 3   | 636.37       | 106.06     |             |                   |
|            |       |        | G3 1   | 624.25       | 104.04     |             |                   |
|            |       |        | G3 2   | 627.28       | 104.55     |             |                   |
|            |       |        | G3 3   | 638.33       | 106.39     |             |                   |
| Uganda     | 396   | Mar-10 | H1 1   | 628.72       | 104.79     | 106.29      | 105.96            |
|            |       |        | H1 2   | 631.81       | 105.30     |             |                   |
|            |       |        | H1 3   | 652.75       | 108.79     |             |                   |
|            |       |        | H2 1   | 628.50       | 104.75     |             |                   |
|            |       |        | H2 2   | 629.70       | 104.95     |             |                   |
|            |       |        | H2 3   | 637.26       | 106.21     |             |                   |
|            |       |        | H3 1   | 625.23       | 104.20     |             |                   |
|            |       |        | H3 2   | 649.94       | 108.32     |             |                   |
|            |       |        | H3 3   | 638.15       | 106.36     |             |                   |
|            | 399   | Sep-10 | I1 1   | 658.82       | 109.80     | 110.60      | 111.91            |
|            |       |        | I1 2   | 663.38       | 110.56     |             |                   |
|            |       |        | I1 3   | 668.64       | 111.44     |             |                   |
|            |       |        | I2 1   | 658.66       | 109.78     |             |                   |
|            |       |        | I2 2   | 664.91       | 110.82     |             |                   |
|            |       |        | I2 3   | 685.88       | 114.31     |             |                   |
|            |       |        | I3 1   | 672.41       | 112.07     |             |                   |
|            |       |        | I3 2   | 676.39       | 112.73     |             |                   |
|            |       |        | I3 3   | 694.09       | 115.68     |             |                   |
| Nigeria    | 396   | Mar-10 | J1 1   | 627.28       | 104.55     | 105.63      | 105.34            |
|            |       |        | J1 2   | 638.18       | 106.36     |             |                   |
|            |       |        | J1 3   | 635.85       | 105.98     |             |                   |
|            |       |        | J2 1   | 628.78       | 104.80     |             |                   |
|            |       |        | J2 2   | 628.84       | 104.81     |             |                   |
|            |       |        | J2 3   | 647.92       | 107.99     |             |                   |
|            |       |        | J3 1   | 620.05       | 103.34     |             |                   |
|            |       |        | J3 2   | 627.49       | 104.58     |             |                   |
|            |       |        | J3 3   | 633.77       | 105.63     |             |                   |
| Rwanda     | 396   | Mar-10 | K1 1   | 620.12       | 103.35     | 104.12      | 104.03            |
|            |       |        | K1 2   | 622.17       | 103.69     |             |                   |
|            |       |        | K1 3   | 631.87       | 105.31     |             |                   |
|            |       |        | K2 1   | 614.24       | 102.37     |             |                   |
|            |       |        | K2 2   | 620.85       | 103.48     |             |                   |
|            |       |        | K2 3   | 628.78       | 104.80     |             |                   |
|            |       |        | K3 1   | 619.29       | 103.21     |             |                   |
|            |       |        | K3 2   | 627.59       | 104.60     |             |                   |
|            |       |        | K3 3   | 632.82       | 105.47     |             |                   |
|            | 397   | Sep-10 | L1 1   | 639.59       | 106.60     | 107.30      | 107.26            |
|            |       |        | L1 2   | 636.53       | 106.09     |             |                   |
|            |       |        | L1 3   | 655.20       | 109.20     |             |                   |
|            |       |        | L2 1   | 635.09       | 105.85     |             |                   |
|            |       |        | L2 2   | 639.13       | 106.52     |             |                   |
|            |       |        | L2 3   | 651.80       | 108.63     |             |                   |
|            |       |        | L3 1   | 636.46       | 106.08     |             |                   |
|            |       |        | L3 2   | 645.34       | 107.56     |             |                   |
|            |       |        | L3 3   | 653.03       | 108.84     |             |                   |

## 6. Assessing pre-treatment: Classification of the efficacy of antimalarial drugs

Table 2.

Classification of antimalarials according to likely efficacy for the treatment of uncomplicated falciparum malaria in West Africa (Ghana, The Gambia, Nigeria) or the regions corresponding to the other AQUAMAT study sites. In the main paper, intermediate- efficacy and ineffective antimalarial drugs are grouped together as one category.

|                                   | Efficacy of pre-treatment: yes (y), no (n), intermediate (i) |                   |
|-----------------------------------|--------------------------------------------------------------|-------------------|
|                                   | Ghana, Gambia or Nigeria                                     | Other study sites |
| quinine injection                 | y                                                            | y                 |
| artemether injection              | y                                                            | y                 |
| artesunate/artemether tabs        | y                                                            | y                 |
| sulphadoxin-pyrimethamine (SP)    | i                                                            | n                 |
| SP-amodiaquine                    | y                                                            | i                 |
| chloroquine                       | n                                                            | n                 |
| amodiaquine                       | y                                                            | i                 |
| artemether-lumefantrine           | y                                                            | y                 |
| artesunate suppository            | y                                                            | y                 |
| artesunate-amodiaquine            | y                                                            | y                 |
| artemether-amodiaquine            | y                                                            | y                 |
| artemether-quinine                | y                                                            | y                 |
| dihydroartemisinin (DHA)          | y                                                            | y                 |
| DHA-amodiaquine                   | y                                                            | y                 |
| SP-artemether-lumefantrine        | y                                                            | y                 |
| pyrimethamine-sulphamethopirazine | i                                                            | n                 |

**7. National and Sponsor Ethics Committee/Institutional Review Board (EC/IRB) approval documents for the AQUAMAT trial**

| Country    | Study Site | Ethical Review Board                                                             | Address of ERB                                                            | Reference Number                              | Document | Date       |
|------------|------------|----------------------------------------------------------------------------------|---------------------------------------------------------------------------|-----------------------------------------------|----------|------------|
| DRC        | Kinshasa   | ESP UNIKIN<br>Comité<br>d'Ethique                                                | Université de Kinshasa<br>Faculté de Médecine<br>BP 11850 Kinshasa<br>DRC | ESP/CE/050/<br>2009                           | Approval | 24/09/2009 |
| DRC        | Kinshasa   |                                                                                  |                                                                           | ESP/CE/050B/<br>2009                          | Revision | 28/12/2009 |
| Ghana      | Kumasi     | Committee for<br>Human<br>Research<br>Publications and<br>Ethics<br>IRB00001567  | University Office<br>Kumasi<br>Ghana                                      | CHRPE/01/01<br>/06                            | Approval | 23/01/2006 |
| Ghana      | Kumasi     |                                                                                  |                                                                           | CHRPE/01/01<br>/06                            | Renewal  | 22/05/2009 |
| Kenya      | Kilifi     | KEMRI/<br>National Ethical<br>Review<br>Committee                                | KEMRI<br>PO Box 54840<br>00200 Nairobi<br>Kenya                           | SSC Protocol<br>No 974<br>KEMRI/RES/<br>7/3/1 | Approval | 21/10/2005 |
| Kenya      | Kilifi     |                                                                                  |                                                                           | KEMRI/RES/<br>7/3/1                           | Renewal  | 29/07/2008 |
| Kenya      | Kilifi     |                                                                                  |                                                                           | KEMRI/RES/<br>7/3/1                           | Renewal  | 06/07/2009 |
| Kenya      | Kilifi     |                                                                                  |                                                                           | KEMRI/RES/<br>7/3/1                           | Renewal  | 18/08/2010 |
| Kenya      | Kilifi     |                                                                                  |                                                                           | KEMRI/RES/<br>7/3/1                           | Revision | 10/07/2008 |
| Kenya      | Kilifi     |                                                                                  |                                                                           | KEMRI/RES/<br>7/3/1                           | Revision | 21/05/2010 |
| The Gambia | Banjul     | The Gambia<br>Government/<br>MRC<br>Laboratories<br>Joint Ethics<br>Committee    | c/o Laboratories<br>Fajara PO Box 273<br>Banjul<br>The Gambia             | SCC1012                                       | Approval | 30/09/2005 |
| Rwanda     | Rwamagana  | Rwanda<br>National Ethics<br>Committee<br>(RNEC)<br>IRB00001497/<br>FWA000001973 | Ministry of Health PO<br>Box 84 Kigali<br>Rwanda                          | 72/RNEC/<br>2009                              | Approval | 03/04/2008 |
| Rwanda     | Rwamagana  |                                                                                  |                                                                           | 72/RNEC/<br>2009                              | Renewal  | 18/06/2009 |
| Rwanda     | Rwamagana  |                                                                                  |                                                                           | 127/RNEC/<br>2009                             | Revision | 02/11/2009 |
| Rwanda     | Nyanza     |                                                                                  |                                                                           | 127/RNEC/<br>2009                             | Approval | 02/11/2009 |

| Country           | Study Site                 | Ethical Review Board                                                           | Address of ERB                                                                          | Reference Number           | Document | Date       |
|-------------------|----------------------------|--------------------------------------------------------------------------------|-----------------------------------------------------------------------------------------|----------------------------|----------|------------|
|                   |                            |                                                                                |                                                                                         | 2009                       |          |            |
| <b>Nigeria</b>    | <b>Ilorin</b>              | University of Ilorin Teaching Hospital Ethical Review Committee<br>IRB00002974 | PMB 1459 Ilorin Kwara State Nigeria                                                     | UITH/CAT/18<br>9/10/659    | Approval | 26/10/2007 |
| <b>Nigeria</b>    | <b>Ilorin</b>              |                                                                                |                                                                                         | UITH/CAT/18<br>9/10/659    | Revision | 14/02/2010 |
| <b>Mozambique</b> | <b>Beira</b>               | Comité Nacional de Bioética para a Saúde IRB 00002657                          | Ministério da Saúde C Postal 264 Av Eduardo Mondlane/Salvador Allende Maputo Moçambique | 52/CNBS/05                 | Approval | 23/06/2005 |
| <b>Mozambique</b> | <b>Beira</b>               |                                                                                |                                                                                         | 105/CNBS/07                | Revision | 04/06/2007 |
| <b>Tanzania</b>   | <b>Korogwe/<br/>Muheza</b> | Tanzania Medical Research Coordinating Committee (MRCC)                        | National Institute for Medical Research P O Box 9653 Dar es Salaam Tanzania             | NIMR/HQ/R<br>8a/Vol IX/435 | Approval | 29/05/2006 |
| <b>Tanzania</b>   | <b>Korogwe/<br/>Muheza</b> |                                                                                |                                                                                         | NIMR/HQ/R<br>8c/Vol IX/527 | Renewal  | 26/02/2007 |
| <b>Tanzania</b>   | <b>Korogwe/<br/>Muheza</b> |                                                                                |                                                                                         | NIMR/HQ/R<br>8c/Vol I/22   | Revision | 20/04/2007 |
| <b>Tanzania</b>   | <b>Korogwe/<br/>Muheza</b> |                                                                                |                                                                                         | NIMR/HQ/R<br>8c/Vol I/60   | Revision | 15/08/2008 |
| <b>Uganda</b>     | <b>Mbarara</b>             | Uganda National Council for Science and Technology FWA 00001293                | Plot 6 Kimera Road, Ntinda PO Box 6884 Kampala Uganda                                   | HS 349                     | Approval | 26/09/2007 |
| <b>Uganda</b>     | <b>Mbarara</b>             |                                                                                |                                                                                         | HS 349                     | Renewal  | 05/09/2008 |
| <b>Uganda</b>     | <b>Mbarara</b>             |                                                                                |                                                                                         | HS 349                     | Renewal  | 31/08/2009 |
| <b>Uganda</b>     | <b>Mbarara</b>             |                                                                                |                                                                                         | HS 349                     | Revision | 04/01/2010 |
| <b>UK</b>         | <b>Oxford</b>              | University of Oxford OXTREC                                                    | University of Oxford Manor House The John Radcliffe Oxford OX3 9DZ United Kingdom       | 034-02                     | Approval | 24/05/2005 |
| <b>UK</b>         | <b>Oxford</b>              |                                                                                |                                                                                         | 034-02                     | Revision | 03/10/2007 |
| <b>UK</b>         | <b>Oxford</b>              |                                                                                |                                                                                         | 034-02                     | Revision | 02/06/2008 |
| <b>UK</b>         | <b>Oxford</b>              |                                                                                |                                                                                         | 034-02                     | Revision | 11/08/2008 |
| <b>UK</b>         | <b>Oxford</b>              |                                                                                |                                                                                         | 034-02                     | Revision | 16/02/2009 |
| <b>UK</b>         | <b>Oxford</b>              |                                                                                |                                                                                         | 034-02                     | Revision | 09/03/2009 |

| <b>Country</b> | <b>Study Site</b> | <b>Ethical Review Board</b> | <b>Address of ERB</b> | <b>Reference Number</b> | <b>Document</b> | <b>Date</b> |
|----------------|-------------------|-----------------------------|-----------------------|-------------------------|-----------------|-------------|
| UK             | Oxford            |                             |                       | 034-02                  | Revision        | 18/03/2009  |
| UK             | Oxford            |                             |                       | 034-02                  | Revision        | 08/06/2009  |
| UK             | Oxford            |                             |                       | 034-02                  | Revision        | 29/09/2009  |
| UK             | Oxford            |                             |                       | 034-02                  | Renewal         | 02/02/2010  |
